# Supplementary material
Source: PubMed Central journal article supplement (PMC1782375)
Supplement: 7601478s4.pdf [file 7601478s4.pdf]

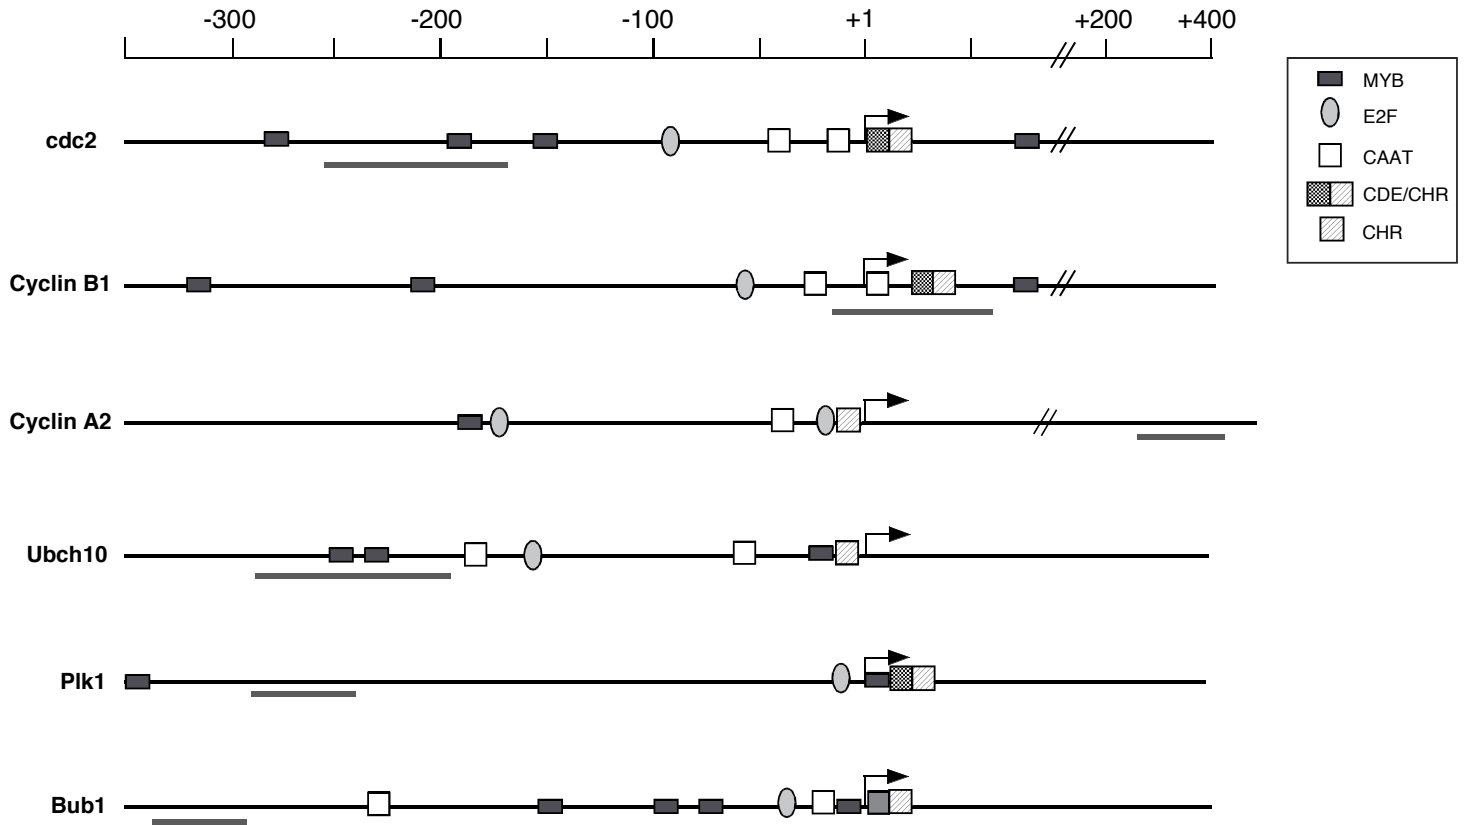

**Figure S3:** Schematic overview of LIN-9 regulated G2/M promoters. Potential binding sites for E2F and B-MYB are indicated. CAAT Boxes, CDE/CHR elements and isolated CHR elements are also shown. Transcription factor binding sites are based on published studies or were identified by comparison with consensus binding sequences. Grey lines indicate real-time PCR amplicons amplified in Chromatin Immunoprecipitation assays.
